# Supplementary material for: Small angle X-ray scattering analysis of ligand-bound forms of tetrameric apolipoprotein-D
Source: Oxford University Press journal article supplement (doi:10.1042/bsr20201423), 2020-12-02
Supplement: bsr-2020-1423_supp.pdf [file bsr-2020-1423_supp.pdf]

kDa

250—

150—

100—

75—

50—

37—

25—

20—

15—

10—

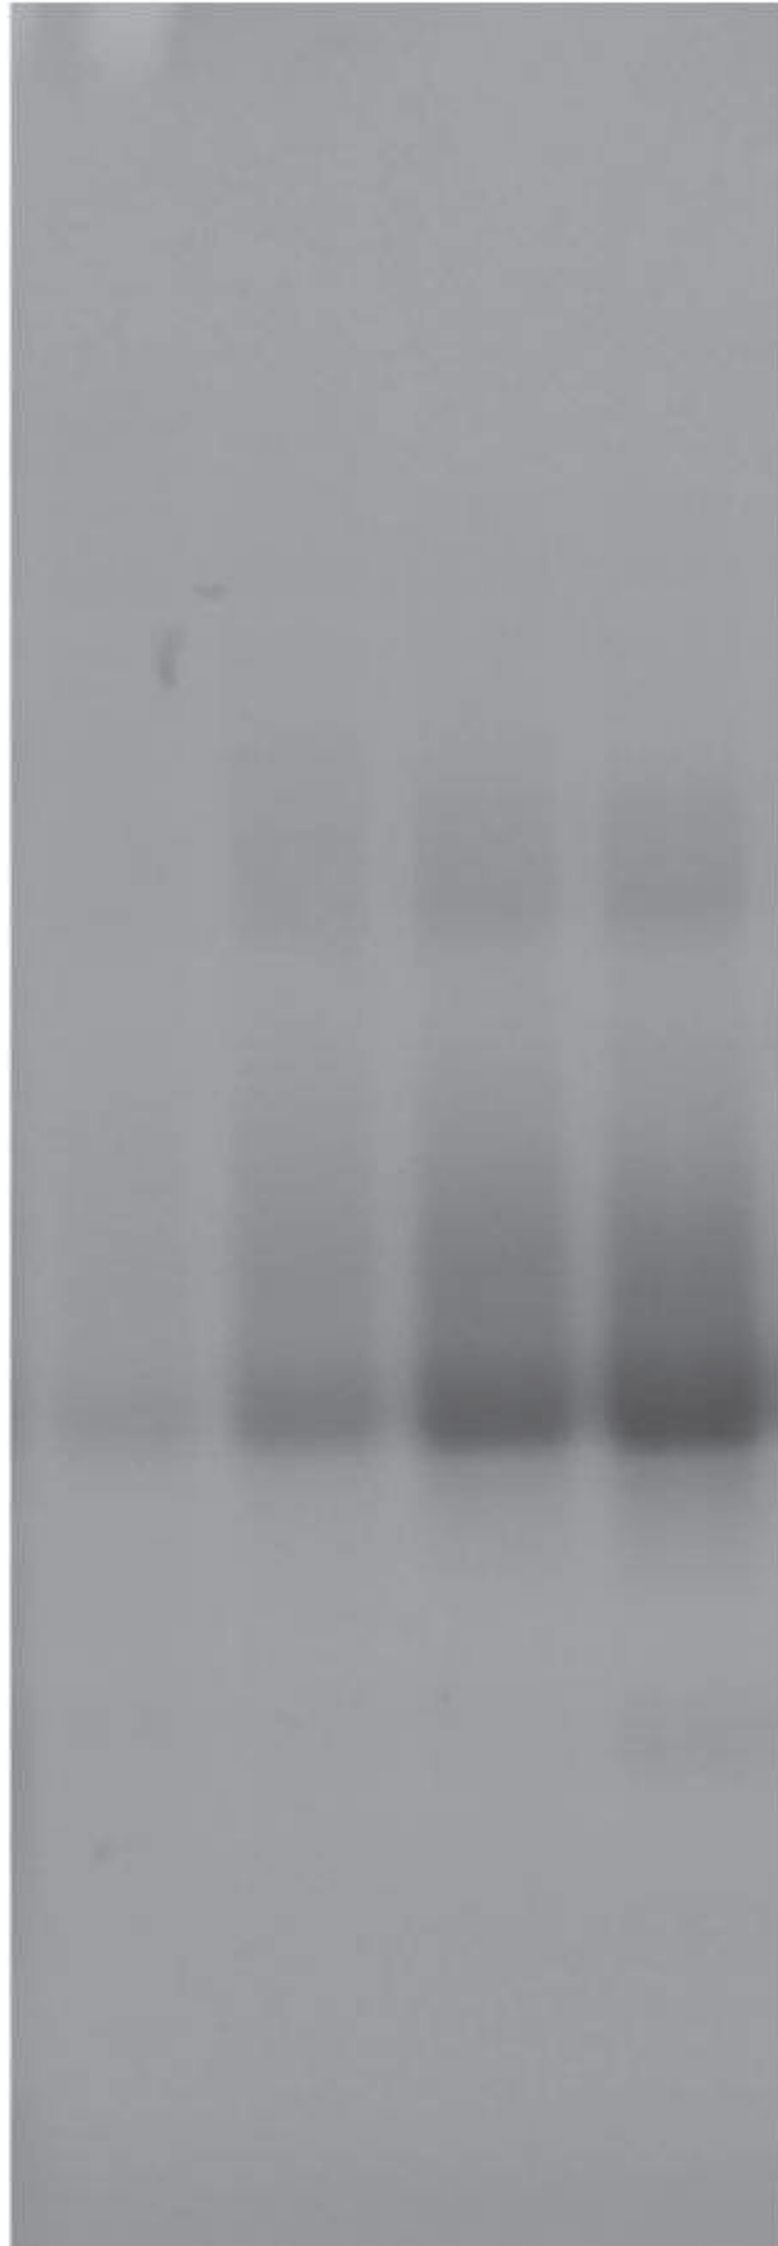

**Figure S1. SDS-PAGE stained with Coomassie of the SEC fractions to be pooled for SAXS analysis.** ApoD was purified using IEX and SEC and eluted fractions from SEC were analysed on SDS-PAGE stained with Coomassie staining. Fractions to be pooled are shown here. ApoD bands show consistent glycosylation with band smearing likely representing glyco-microheterogeneity.
